# Supplementary material for: Widespread choroid plexus contamination in sampling and profiling of brain tissue
Source: PubMed Central journal article supplement (PMC9095494; doi:10.1038/s41380-021-01416-3), 2022-01-05
Supplement: 41380_2021_1416_MOESM7_ESM.pdf [file 41380_2021_1416_MOESM7_ESM.pdf]

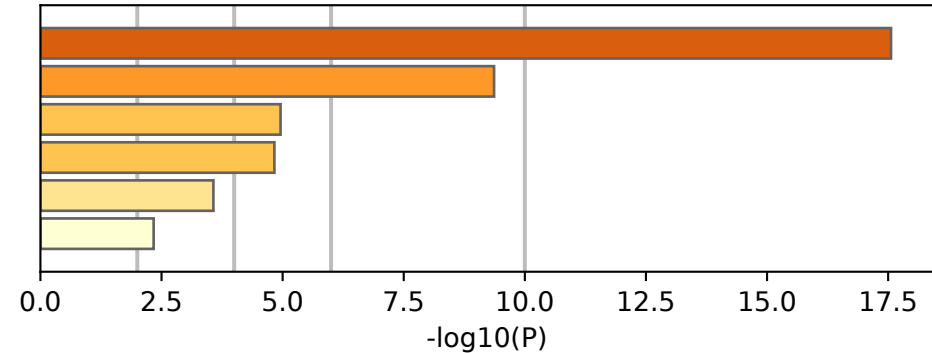

GO:0003341: cilium movement

GO:0060294: cilium movement involved in cell motility

GO:0007368: determination of left/right symmetry

GO:0007272: ensheathment of neurons

R-HSA-425407: SLC-mediated transmembrane transport

GO:0007043: cell-cell junction assembly
