# Supplementary material for: Widespread choroid plexus contamination in sampling and profiling of brain tissue
Source: PubMed Central journal article supplement (PMC9095494; doi:10.1038/s41380-021-01416-3), 2022-01-05

**A)** Allen Brain Atlas  
Female hippocampus (n = 41)

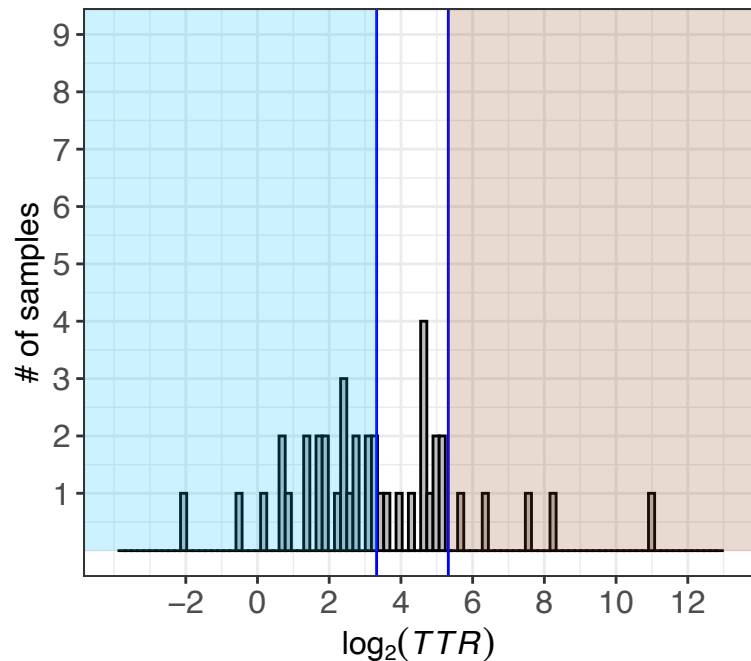

**B)** Allen Brain Atlas  
Male hippocampus (n = 53)

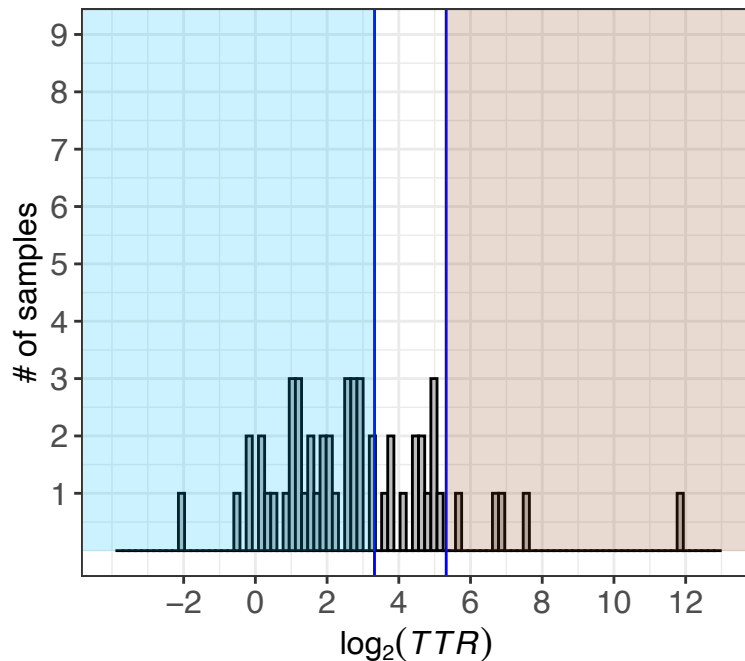

**C)** Allen Brain Atlas  
Female hippocampus  
FDRq < 0.05,  $-1 > \text{LogFC} > 1$

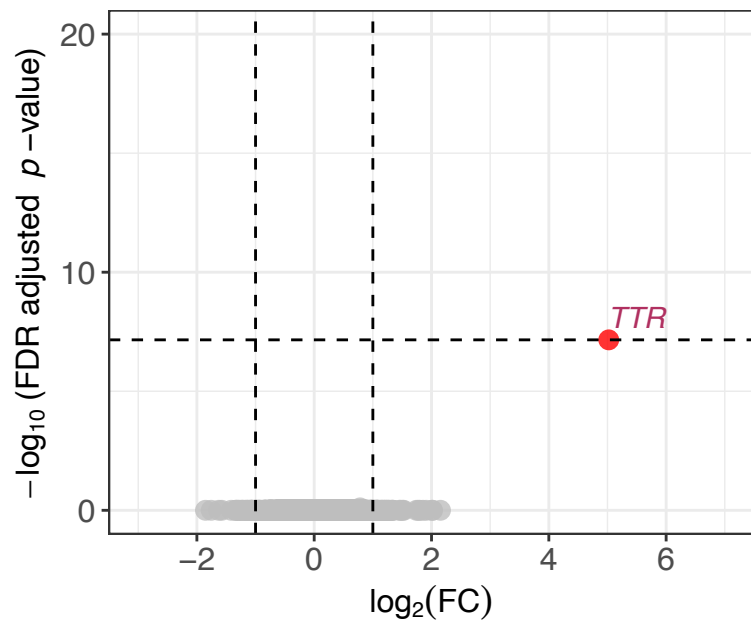

**D)** Allen Brain Atlas  
Male hippocampus  
FDRq < 0.05,  $-1 > \text{LogFC} > 1$

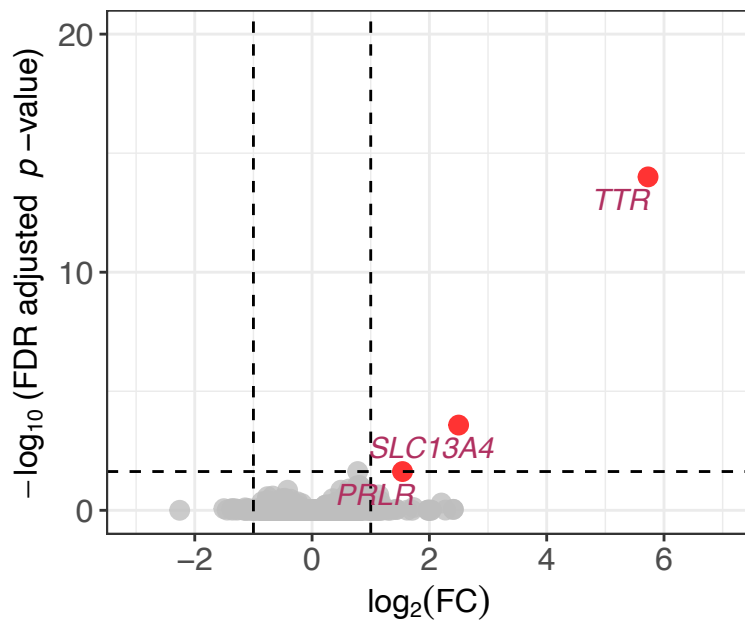

Supplement: 41380_2021_1416_MOESM9_ESM.pdf [file 41380_2021_1416_MOESM9_ESM.pdf]
