# Supplementary material for: Widespread choroid plexus contamination in sampling and profiling of brain tissue
Source: PubMed Central journal article supplement (PMC9095494; doi:10.1038/s41380-021-01416-3), 2022-01-05

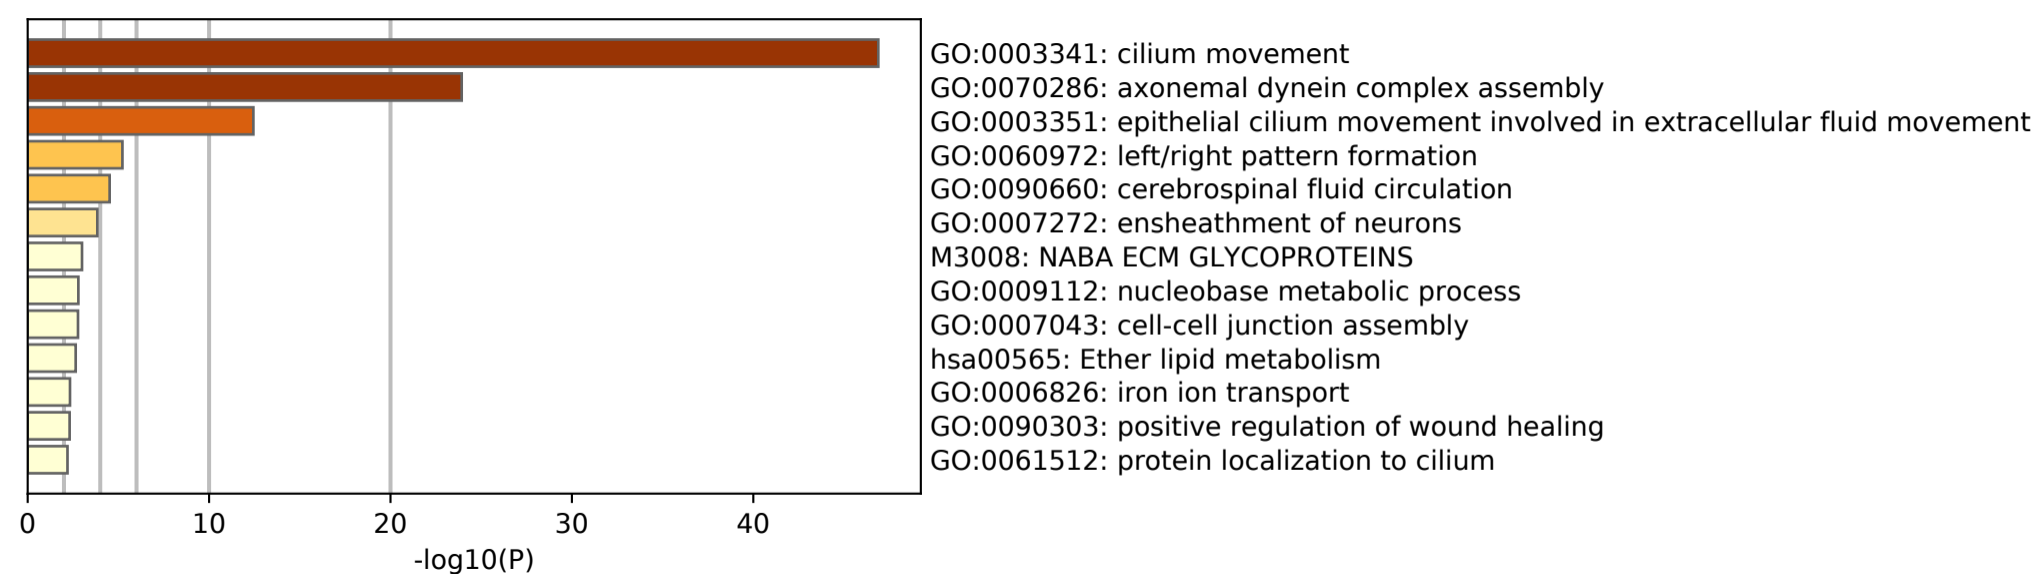

Supplement: 41380_2021_1416_MOESM11_ESM.pdf [file 41380_2021_1416_MOESM11_ESM.pdf]
